# Supplementary material for: Chemotherapy-related cachexia is associated with mitochondrial depletion and the activation of ERK1/2 and p38 MAPKs
Source: PubMed Central journal article supplement (PMC5190036; doi:10.18632/oncotarget.9779), 2016-06-02
Supplement: oncotarget-07-43442-s001.pdf [file oncotarget-07-43442-s001.pdf]

## Chemotherapy-related cachexia is associated with mitochondrial depletion and the activation of ERK1/2 and p38 MAPKs

### Supplementary Materials

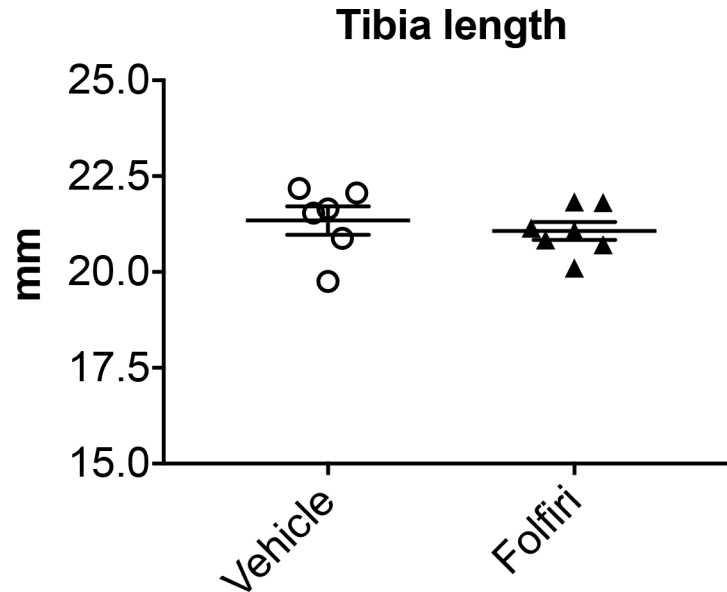

**Supplementary Figure S1: Tibia length is unchanged in animals receiving chemotherapy.** Tibia length in mice receiving either Folfiri or the control vehicle for up to 5 weeks was measured by taking advantage of a digital caliper. Data are reported on a scattered dot plot as Vehicle ( $n = 6$ ) and Folfiri ( $n = 7$ ) and expressed as means  $\pm$  SEM.

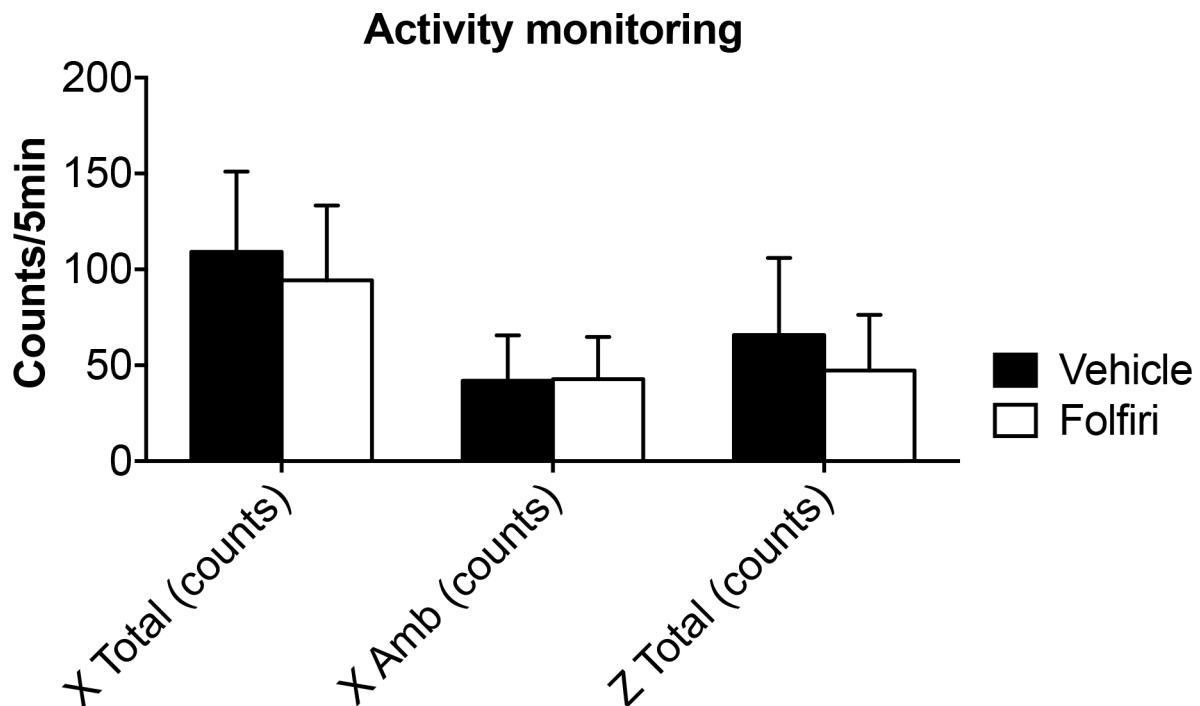

**Supplementary Figure S2: Activity monitoring in mice exposed to Folfiri.** Activity monitoring in animals administered chemotherapy was assessed by utilizing the VersaMax AccuScan system. Animal movements along the X and Z axes were detected. Data are reported as Counts/5 minutes and expressed as means  $\pm$  SEM.

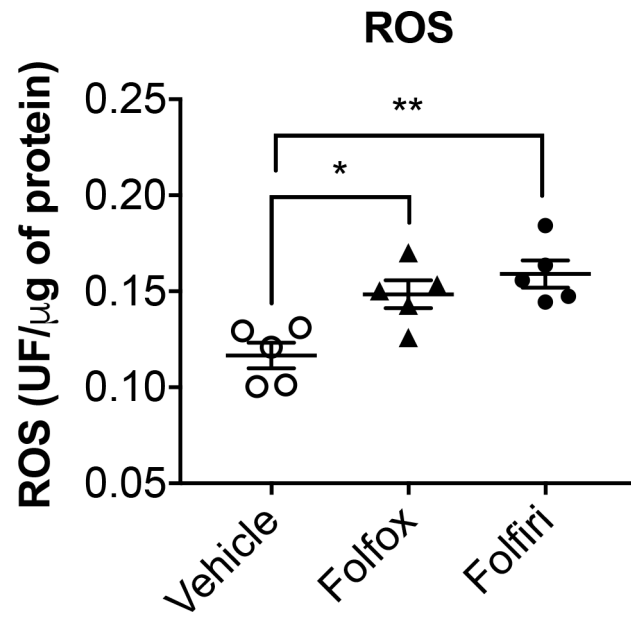

**Supplementary Figure S3: Detection of ROS levels in the skeletal muscle of mice exposed to chemotherapy.** Detection of ROS levels in the quadriceps muscle of mice exposed to Folfox or Folfiri ( $n = 5$ ) for up to 5 weeks. Data are reported on a scattered dot plot and expressed as means  $\pm$  SEM. Significance of the differences: \* $p < 0.05$ ; \*\* $p < 0.01$ .

**Supplementary Table S1: Next-Generation RNA-sequencing analyses**

| Gene    | Log Fold Change | p value  | FDR      | Function                               |
|---------|-----------------|----------|----------|----------------------------------------|
| Ucp1    | -6.4            | 2.66E-05 | 1.81E-02 | Mitochondrial metabolism/biogenesis    |
| Cidea   | -4.6            | 1.36E-04 | 5.00E-02 | Mitochondrial metabolism/biogenesis    |
| Nnat    | -3.3            | 7.05E-05 | 3.40E-02 | Other                                  |
| Hspa1b  | -3.1            | 6.63E-05 | 3.40E-02 | Heat shock response                    |
| Gyk     | -2.8            | 5.51E-05 | 3.05E-02 | Other                                  |
| Fam107a | -2.3            | 1.29E-06 | 5.00E-03 | Other                                  |
| Chac1   | -1.8            | 7.95E-06 | 1.28E-02 | Notch signaling regulator              |
| Acot2   | -1.7            | 3.38E-05 | 2.18E-02 | Mitochondrial metabolism/biogenesis    |
| Fhl3    | -1.2            | 7.12E-05 | 3.40E-02 | Muscle cell proliferation/pluripotency |
| Prkcz   | 1.4             | 9.13E-05 | 3.92E-02 | Other                                  |
| Lrp2bp  | 1.5             | 1.20E-05 | 1.41E-02 | Other                                  |
| Sytl2   | 1.5             | 2.37E-05 | 1.70E-02 | Other                                  |
| Masp2   | 1.6             | 1.24E-04 | 5.00E-02 | Other                                  |
| Car9    | 1.6             | 1.02E-04 | 4.23E-02 | Other                                  |
| Scd2    | 1.6             | 5.24E-06 | 1.13E-02 | Lipid metabolism/transport             |
| Spon2   | 1.7             | 5.68E-05 | 3.05E-02 | Member of the ERK1/2 signaling         |
| Pax3    | 2.0             | 1.34E-04 | 5.15E-02 | Muscle cell proliferation/pluripotency |
| Fam196b | 2.2             | 3.96E-05 | 2.43E-02 | Other                                  |
| Hamp2   | 2.3             | 4.98E-05 | 2.92E-02 | Other                                  |
| Exoc3l4 | 2.8             | 1.26E-07 | 9.52E-04 | Other                                  |
| Apoh    | 3.0             | 1.37E-05 | 1.47E-02 | Lipid metabolism/transport             |
| Slc4a1  | 3.6             | 1.55E-06 | 5.00E-03 | Ion transport                          |
| Ccl8    | 3.7             | 1.00E-05 | 1.31E-02 | Chemokine/Inflammation                 |
| Apoa1   | 4.5             | 1.01E-05 | 1.31E-02 | Lipid metabolism/transport             |
| Mup6    | 4.6             | 4.99E-06 | 1.13E-02 | Other                                  |
| Alb     | 4.7             | 2.14E-05 | 1.70E-02 | Acute phase response                   |
| Fga     | 4.9             | 7.28E-06 | 1.28E-02 | Acute phase response                   |
| Ttr     | 5.1             | 2.35E-05 | 1.70E-02 | Other                                  |
| Pzp     | 5.1             | 7.67E-05 | 3.43E-02 | Other                                  |
| Fgb     | 5.2             | 7.72E-05 | 3.43E-02 | Acute phase response                   |
| Apoa2   | 5.4             | 2.25E-05 | 1.70E-02 | Lipid metabolism/transport             |
| Apob    | 5.7             | 1.88E-05 | 1.70E-02 | Lipid metabolism/transport             |
| Fabp1   | 6.0             | 1.83E-05 | 1.70E-02 | Lipid metabolism/transport             |
| Dnah5   | 8.1             | 1.48E-07 | 9.52E-04 | Energy metabolism/ATPase               |

Data expressed as Log Fold Change vs. Vehicle. Only genes associated with FDR  $\leq$  0.05 were included in the table.

**Supplementary Table S2: Chemotherapy dosing schedule**

| <b>Drug</b>        | <b>mg/Kg</b> | <b>Chemotherapy regimen &amp; Dosing schedule</b>                                                      |                                                                                                    |
|--------------------|--------------|--------------------------------------------------------------------------------------------------------|----------------------------------------------------------------------------------------------------|
| <i>Oxaliplatin</i> | 6            | <b>FOLFOX</b><br><i>(Oxaliplatin administered 2h before 5-FU and<br/>Leucovorin)</i><br>i.p. once/week | <b>FOLFIRI</b><br><i>(CPT-11 administered 2h after 5-FU and<br/>Leucovorin)</i><br>i.p. twice/week |
| <i>5-FU</i>        | 30           |                                                                                                        |                                                                                                    |
| <i>Leucovorin</i>  | 90           |                                                                                                        |                                                                                                    |
| <i>CPT-11</i>      | 24           |                                                                                                        |                                                                                                    |
